# Supplementary material for: Transcriptional and Post-Transcriptional Regulation of Thrombospondin-1 Expression: A Computational Model
Source: PLOS journal article supplement (doi:10.1371/journal.pcbi.1005272), 2017-01-03
Supplement: S9 (10.1371/journal.pcbi.1005272.s009) [file journal.pcbi.1005272.s009]

S6\_Fig

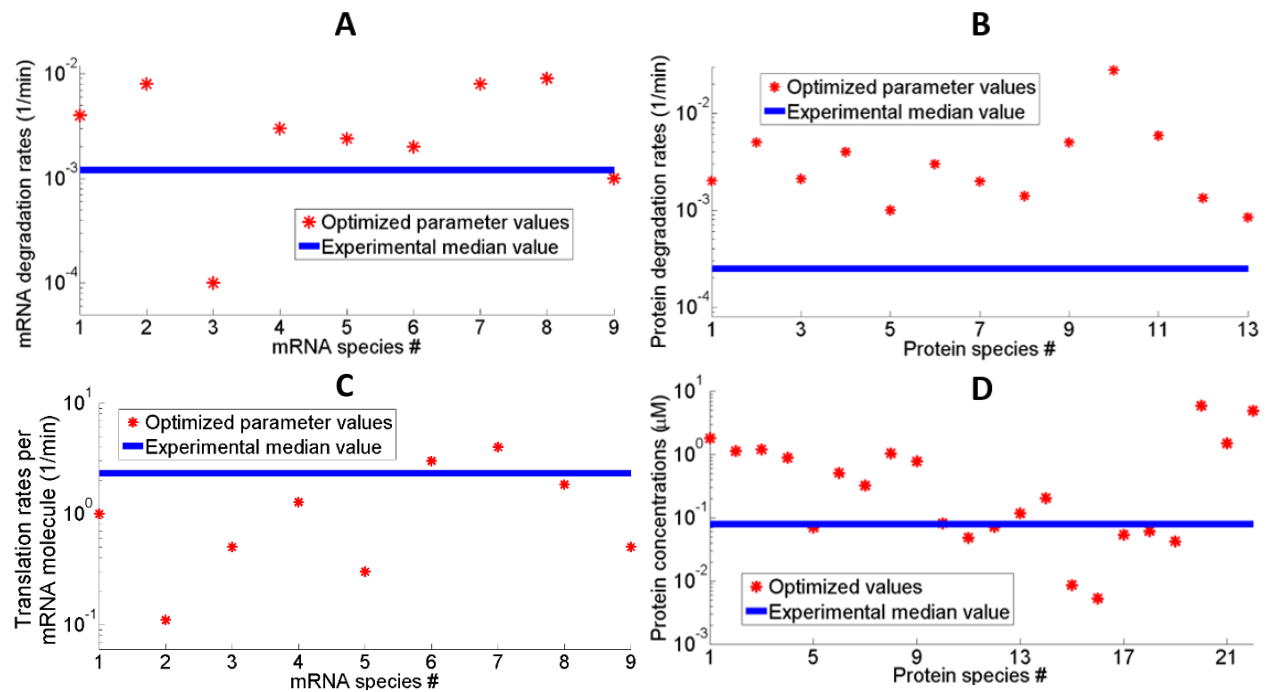

**S6\_Fig. Model parameter distributions.** Distribution of protein/mRNA turnover parameters and initial conditions used in the model including (A) mRNA degradation rates of different species (median  $1.2 \times 10^{-3} \text{ min}^{-1}$ ), (B) protein degradation rates of different species (median  $2.5 \times 10^{-4} \text{ min}^{-1}$ ), (C) rate of translation of different mRNA species (median 2.33 proteins per mRNA per min), and (D) protein concentrations of different species (median 0.08  $\mu\text{M}$ ). (A-D) The red asterisks are optimized model parameter values and the blue lines are the experimental median values obtained from literature (1, 2).

## References

1. Yang E, van Nimwegen E, Zavolan M, Rajewsky N, Schroeder M, Magnasco M, et al. Decay rates of human mRNAs: correlation with functional characteristics and sequence attributes. *Genome research*. 2003;13(8):1863-72.
2. Schwanhaussner B, Busse D, Li N, Dittmar G, Schuchhardt J, Wolf J, et al. Corrigendum: Global quantification of mammalian gene expression control. *Nature*. 2013;495(7439):126-7.
